# Supplementary material for: Increased CD8+ T cell responses to apoptotic T cell-associated antigens in multiple sclerosis
Source: PubMed Central journal article supplement (PMC3734107; doi:10.1186/1742-2094-10-94), 2013-07-27
Supplement: 1742-2094-10-94-S1.pdf [file 1742-2094-10-94-S1.pdf]

Supplementary Table 1A: HLA-A2 binding peptides derived from apoptotic cell-associated proteins.

| Pool | Organism | Protein | 1 <sup>st</sup> pos <sup>o</sup> | Sequence        | Lenght | Binding capacity (IC50§ nM) |        |        |        |        | bound |
|------|----------|---------|----------------------------------|-----------------|--------|-----------------------------|--------|--------|--------|--------|-------|
|      |          |         |                                  |                 |        | A*0201                      | A*0202 | A*0203 | A*0206 | A*6802 |       |
| 1    | Human    | ACT'    | 131                              | AMYVAIQAV       | 9      | 2.8                         | 1.5    | 1.6    | 7.1    | 190    | 5     |
|      | Human    | ACT     | 319                              | ALAPSTMKI       | 9      | 4.3                         | 2.9    | 2.5    | 40     | 5.5    | 5     |
|      | Human    | ACT     | 266                              | FLGMESCGI       | 9      | 2.7                         | 71     | 11     | 16     | 3979   | 4     |
|      | Human    | ACT     | 312                              | RMQKEITAL       | 9      | 14                          | 0.29   | 6.5    | 28     | 6667   | 4     |
|      | Human    | ACT     | 348                              | SLSTFQQMWI      | 10     | 5.6                         | 4.5    | 7.7    | 791    | 299    | 4     |
|      | Human    | ACT     | 46                               | GMGQKDSYV       | 9      | 196                         | 17     | 156    | 13547  | 17632  | 3     |
| 2    | Human    | ROK^    | 154                              | SLAGGIIGV       | 9      | 0.56                        | 1.0    | 1.1    | 0.14   | 49     | 5     |
|      | Human    | ROK     | 67                               | ALRTDYNASV      | 10     | 8.9                         | 5.0    | 11     | 349    | 1354   | 4     |
|      | Human    | ROK     | 193                              | VLIGGKPD RV     | 10     | 14                          | 8.5    | 12     | 1282   | 7417   | 3     |
|      | Human    | ROK     | 209                              | ILD L I E S P I | 10     | 360                         | 65     | 1272   | 2598   | 3083   | 2     |
|      | Human    | ROK     | 122                              | QLPLESDAV       | 9      | 246                         | 601    | 1270   | 925    | 1999   | 1     |
| 3    | Human    | LAM 1** | 496                              | TIWAANAGV       | 9      | 8.9                         | 263    | 308    | 22     | 20     | 5     |
|      | Human    | LAM 1   | 41                               | RLAVYIDKV       | 9      | 0.16                        | 0.84   | 0.18   | 14     | 1004   | 4     |
|      | Human    | LAM 1   | 301                              | SLSSQLSNL       | 9      | 1.6                         | 0.57   | 2.4    | 104    | 1377   | 4     |
|      | Human    | LAM 1   | 361                              | QLLDV KLAL      | 9      | 0.060                       | 98     | 288    | 4.0    | 5848   | 4     |
|      | Human    | LAM 1   | 291                              | ELMESRMRI       | 9      | 246                         | 1226   | 284    | 25188  | 45     | 3     |
|      | Human    | LAM 1   | 355                              | QLNDYEQLL       | 9      | 2.0                         | 0.23   | 18     | 1493   | 4808   | 3     |
|      | Human    | LAM 1   | 388                              | KLSPSPSSRV      | 10     | 50                          | 18     | 45     | 563    | 20979  | 3     |
|      | Human    | LAM 1   | 488                              | VLKAGQVTI       | 10     | 263                         | 37     | 23     | 4060   | 15429  | 3     |
|      | Human    | LAM 1   | 378                              | KLLEGE EERL     | 10     | 30                          | 29     | 3395   | 1944   | 20515  | 2     |
| 4    | Human    | MYH9"   | 9                                | YLYVDKNFI       | 9      | 9.3                         | 0.85   | 4.8    | 45     | 217    | 5     |
|      | Human    | MYH9    | 108                              | GLIYTY SGL      | 9      | 22                          | 11     | 10     | 197    | 58     | 5     |
|      | Human    | MYH9    | 111                              | YTYSGLFCV       | 9      | 0.12                        | 2.1    | 3.0    | 0.84   | 3.2    | 5     |
|      | Human    | MYH9    | 145                              | EMPPHIYAI       | 9      | 323                         | 67     | 110    | 85     | 1.8    | 5     |
|      | Human    | MYH9    | 186                              | KVIQYLAYV       | 9      | 0.67                        | 0.17   | 1.2    | 0.21   | 1.8    | 5     |
|      | Human    | MYH9    | 478                              | QLFNKHTMFI      | 9      | 1.4                         | 0.71   | 3.2    | 14     | 14     | 5     |
|      | Human    | MYH9    | 584                              | WLMKNMDPL       | 9      | 9.7                         | 0.36   | 14     | 6.0    | 1.9    | 5     |
|      | Human    | MYH9    | 653                              | QLAKLMATL       | 9      | 5.4                         | 1.4    | 2.9    | 26     | 18     | 5     |
|      | Human    | MYH9    | 111                              | YTYSGLFCVV      | 10     | 0.21                        | 0.34   | 0.12   | 4.2    | 0.4    | 5     |

<sup>o</sup>=1st amino acid position; §=IC50 indicates binding affinity and it is expressed as 50% inhibitory nanomolar concentration, a dash ("-") indicates an IC50 >50000 nM; peptides with IC50 <50nM are classified as high affinity peptides, peptides with IC50>50 and <500nM are classified as intermediate affinity peptides, peptides with IC50>500nM are classified as low affinity peptides; ' =actin cytoplasmatic 1; ^ =eterogeneous nuclear ribonucleoprotein K; \*\* =lamin B1; " =non muscle myosin.

Supplementary Table 1B: HLA-A2 binding peptides derived from apoptotic cell-associated proteins.

| Pool | Organism | Protein            | 1 <sup>st</sup> pos <sup>o</sup> | Sequence   | Lenght | Binding capacity (IC50§ nM) |        |        |        |        | bound |
|------|----------|--------------------|----------------------------------|------------|--------|-----------------------------|--------|--------|--------|--------|-------|
|      |          |                    |                                  |            |        | A*0201                      | A*0202 | A*0203 | A*0206 | A*6802 |       |
| 5    | Human    | MYH9 <sup>"</sup>  | 424                              | RMFRWLVLRI | 10     | 1.1                         | 5.0    | 10     | 71     | 398    | 5     |
|      | Human    | MYH9               | 478                              | QLFMHTMFIL | 10     | 0.97                        | 0.42   | 8.2    | 49     | 82     | 5     |
|      | Human    | MYH9               | 302                              | FLSNGHVTI  | 9      | 0.11                        | 1.0    | 3.8    | 11     | 3050   | 4     |
|      | Human    | MYH9               | 338                              | GLLRVISGV  | 9      | 0.21                        | 3.0    | 3.1    | 4.3    | 8823   | 4     |
|      | Human    | MYH9               | 412                              | FAIEALAKA  | 9      | 26                          | 1.7    | 4.0    | 0.43   | -      | 4     |
|      | Human    | MYH9               | 450                              | ILDIAGFEI  | 9      | 5.5                         | 50     | 257    | 21     | 3064   | 4     |
|      | Human    | MYH9               | 733                              | FMDGKQACV  | 9      | 0.18                        | 7.8    | 33     | 6.6    | 10345  | 4     |
|      | Human    | MYH9               | 741                              | VLMIKALEL  | 9      | 0.15                        | 15     | 38     | 78     | 870    | 4     |
|      | Human    | MYH9               | 1277                             | KLQVELDNV  | 9      | 4.1                         | 8.8    | 30     | 9.2    | -      | 4     |
| 6    | Human    | MYH9               | 1843                             | KLKDVLLQV  | 9      | 3.3                         | 2.5    | 6.7    | 0.20   | 18519  | 4     |
|      | Human    | MYH9               | 279                              | YLLSGAGEHL | 10     | 4.9                         | 6.3    | 175    | 11     | -      | 4     |
|      | Human    | MYH9               | 733                              | FMDGKQACVL | 10     | 21                          | 27     | 158    | 683    | 374    | 4     |
|      | Human    | MYH9               | 1920                             | KLRRGDLPFV | 10     | 2.9                         | 15     | 9.1    | 5.5    | -      | 4     |
|      | Human    | MYH9               | 210                              | QLLQANPIL  | 9      | 4.5                         | 183    | 1507   | 19     | -      | 3     |
|      | Human    | MYH9               | 847                              | MMAKEEELV  | 9      | 9.1                         | 1.2    | 276    | 1070   | 5639   | 3     |
|      | Human    | MYH9               | 877                              | QLMAEKLQL  | 9      | 8.2                         | 7.9    | 205    | 657    | 4360   | 3     |
|      | Human    | MYH9               | 1726                             | RLEARIAQL  | 9      | 433                         | 7.7    | 15     | 2292   | 46881  | 3     |
|      | Human    | MYH9               | 1793                             | KLQEMEGTV  | 9      | 23                          | 99     | 48     | 867    | 19355  | 3     |
| 7    | Human    | MYH9               | 660                              | TLRNTNPNFV | 10     | 21                          | 107    | 40     | -      | 593    | 3     |
|      | Human    | MYH9               | 688                              | VLDQLRCNGV | 10     | 6.6                         | 186    | 61     | 868    | -      | 3     |
|      | Human    | MYH9               | 752                              | NLYRIGQSKV | 10     | 322                         | 87     | 76     | 17848  | 1024   | 3     |
|      | Human    | MYH9               | 248                              | YIVGANIET  | 9      | 422                         | 622    | 9009   | 81     | 626    | 2     |
|      | Human    | MYH9               | 1540                             | QLEELEDEL  | 9      | 404                         | 176    | -      | 28866  | 4718   | 2     |
|      | Human    | MYH9               | 161                              | MMQDREDQSI | 10     | 2.1                         | 25     | 542    | 1245   | 4005   | 2     |
|      | Human    | MYH9               | 821                              | KLRNQWQWRL | 10     | 56                          | 54     | 1037   | 5442   | -      | 2     |
|      | Human    | MYH9               | 846                              | EMMAKEEELV | 10     | 33                          | 9.6    | 958    | 2456   | 2809   | 2     |
| 8    | Human    | GDIS <sup>^^</sup> | 100                              | VLKEGSEYRV | 10     | 342                         | 10     | 149    | 1003   | 234    | 4     |
|      | Human    | GDIS               | 186                              | HLSWEWNLSI | 10     | 6,1                         | 13     | 68     | 56     | 1093   | 4     |
|      | Human    | GDIS               | 37                               | EMDKDDESL  | 9      | 340                         | 637    | 1099   | 360    | 42     | 3     |
|      | Human    | GDIS               | 51                               | TLLGDGIVV  | 9      | 20                          | 547    | 675    | 236    | 4354   | 2     |

<sup>o</sup>=1st amino acid position; §=IC50 indicates binding affinity and it is expressed as 50% inhibitory nanomolar concentration, a dash ("-") indicates an IC50 >50000 nM; peptides with IC50 <50nM are classified as high affinity peptides, peptides with IC50>50 and <500nM are classified as intermediate affinity peptides, peptides with IC50>500nM are classified as low affinity peptides; "<sup>"</sup>=non muscle myosin; <sup>^^</sup>=rho GDP dissociation inhibitor 2.

Supplementary Table 1C: HLA-A2 binding peptides derived from apoptotic cell-associated proteins.

| Pool | Organism | Protein             | 1 <sup>st</sup> pos <sup>o</sup> | Sequence   | Lenght | Binding capacity (IC50§ nM) |        |        |        |        | bound |
|------|----------|---------------------|----------------------------------|------------|--------|-----------------------------|--------|--------|--------|--------|-------|
|      |          |                     |                                  |            |        | A*0201                      | A*0202 | A*0203 | A*0206 | A*6802 |       |
| 9    | Human    | VIME***             | 176                              | NLAEDIMRL  | 9      | 1.0                         | 0.31   | 4.2    | 136    | 83     | 5     |
|      | Human    | VIME                | 50                               | SLIASSPGGD | 10     | 2.2                         | 4.3    | 2.4    | 461    | 452    | 5     |
|      | Human    | VIME                | 68                               | RLRSSVPGV  | 10     | 3.3                         | 27     | 1.6    | 30     | 9901   | 4     |
|      | Human    | VIME                | 129                              | ILLAELEQL  | 9      | 35                          | 6.5    | 231    | 7.5    | -      | 4     |
|      | Human    | VIME                | 225                              | SLQEEIAFL  | 9      | 0.99                        | 0.37   | 19     | 44     | 4777   | 4     |
|      | Human    | VIME                | 78                               | LLQDSVDFSL | 10     | 3.6                         | 1.1    | 149    | 9.2    | 1931   | 4     |
|      | Human    | VIME                | 79                               | LQDSVDFSL  | 9      | 5.9                         | 47     | 10155  | 2.3    | 774    | 3     |
|      | Human    | VIME                | 419                              | SLNLRETNL  | 9      | 402                         | 1.4    | 22     | 16458  | -      | 3     |
|      | Human    | VIME                | 122                              | FLEQQNKILL | 10     | 20                          | 0.43   | 63     | 828    | 10669  | 3     |
|      | Human    | VIME                | 370                              | NMKEEMARHL | 10     | 260                         | 433    | 703    | 10578  | 9346   | 2     |
| 10   | Human    | PSA1 <sup>'''</sup> | 179                              | FMECNLNEL  | 9      | 596                         | 27     | 55     | 15067  | 14822  | 2     |
|      | Human    | PSA1                | 183                              | NLNELVKHGL | 10     | 145                         | 12     | 11     | 4834   | 3618   | 3     |
|      | Human    | PSA1                | 175                              | HMSEFMECNL | 10     | 59                          | 11     | 70     | 109    | 35360  | 4     |
|      | Human    | PSA1                | 63                               | ILHVDNHIGI | 10     | -                           | -      | 16720  | -      | -      | 0     |
|      | Human    | PSA1                | 37                               | GLKSKTHAV  | 9      | -                           | 4552   | 924    | -      | 19982  | 0     |
|      | Human    | PSA1                | 110                              | SLIGSKTQI  | 9      | -                           | 15913  | 511    | 34100  | 17135  | 0     |
|      | Human    | PSA1                | 179                              | FMECNLNELV | 10     | 12715                       | 194    | 1      | -      | -      | 2     |
|      | Human    | PSA1                | 48                               | ALKRAQSEL  | 9      | -                           | -      | 18952  | -      | 29040  | 0     |
|      | Human    | PSA1                | 76                               | GLTADARLL  | 9      | 163                         | 4.7    | 1      | 7.8    | 12     | 5     |
| 11   | Human    | PSA1                | 102                              | PLPVSRLVSL | 10     | 4.5                         | 1.2    | 0.21   | 40     | 1659   | 4     |
|      | Human    | PSA1                | 204                              | DLTTKNVSI  | 9      | 465                         | 3.6    | 54     | 4278   | 7386   | 3     |
|      | Human    | PSA1                | 45                               | ELNGKNIEDV | 10     | 104                         | 1.2    | 0.21   | 1776   | 14417  | 3     |
|      | Human    | PSA1                | 55                               | ELAAHQKKI  | 9      | 38                          | 2      | 1.1    | 100    | 9790   | 4     |
|      | Human    | PSA1                | 186                              | ELVKHGLRAL | 10     | 296                         | 15     | 1.6    | 8411   | -      | 3     |
|      | Human    | PSA1                | 37                               | GLKSKTHAVL | 10     | 2366                        | 116    | 24     | 10609  | 21672  | 2     |
|      | Human    | PSA1                | 191                              | GLRALRETL  | 9      | 41760                       | 45     | 23     | -      | -      | 2     |
|      | Human    | PSA1                | 55                               | ELAAHQKKIL | 10     | 8856                        | 146    | 362    | 16700  | -      | 2     |
|      | Human    | PSA1                | 97                               | FVDRPLPV   | 9      | -                           | 8417   | 2175   | 9732   | 44603  | 0     |
| 12   | Human    | RLA <sup>^^</sup>   | 3                                | YVASYLLAA  | 9      | -                           | 6236   | 2649   | -      | 1908   | 0     |
|      | Human    | RLA                 | 26                               | ILDSVGIEA  | 9      | 1271                        | 235    | 112    | 1756   | 1598   | 2     |
|      | Human    | RLA                 | 3                                | YVASYLLAAL | 10     | 1                           | 0.88   | 0.5    | 2.4    | 1.5    | 5     |

<sup>o</sup>=1st amino acid position; §=IC50 indicates binding affinity and it is expressed as 50% inhibitory nanomolar concentration, a dash ("-") indicates an IC50 >50000 nM; peptides with IC50 <50nM are classified as high affinity peptides, peptides with IC50>50 and <500nM are classified as intermediate affinity peptides, peptides with IC50>500nM are classified as low affinity peptides; \*\*\*=vimentin; <sup>'''</sup>PSA1= Proteasome component C2; <sup>^^</sup>RLA2=60S acidic ribosomal protein P2.
