# Supplementary material for: Increased CD8+ T cell responses to apoptotic T cell-associated antigens in multiple sclerosis
Source: PubMed Central journal article supplement (PMC3734107; doi:10.1186/1742-2094-10-94), 2013-07-27
Supplement: 1742-2094-10-94-S2.pdf [file 1742-2094-10-94-S2.pdf]

**Supplementary Table 2: HLA-A2 binding peptides derived from MBP protein**

| <b>Peptide</b> | <b>Organism</b> | <b>1<sup>st</sup> pos</b> | <b>Sequence</b>       | <b>Leght</b> |
|----------------|-----------------|---------------------------|-----------------------|--------------|
| 1              | Human           | 1                         | ASQKRPSQRHGSKYLATAST  | 20           |
| 2              | Human           | 13                        | KYLATASTMDHARHGFLPRH  | 20           |
| 3              | Human           | 23                        | HARHGFLPRHRDTGILDSIG  | 20           |
| 4              | Human           | 33                        | RTDGILDSIGRFFGGDRGAP  | 20           |
| 5              | Human           | 43                        | RFFGGDRGAPKRGSGKDSHH  | 20           |
| 6              | Human           | 55                        | GSGKDSHHPARTAHYGSLPQ  | 20           |
| 7              | Human           | 65                        | RTAHYGSLPQKSHGRTQDEN  | 20           |
| 8              | Human           | 74                        | QKSHGRTQDENPVVHFFKNI  | 20           |
| 9              | Human           | 84                        | NPVVHFFKNIVTPRTPPPSQ  | 20           |
| 10             | Human           | 94                        | VTPRTPPPSQGKGRGLSLSR  | 20           |
| 11             | Human           | 104                       | GKGRGLSLSRFSWGAEGQPR  | 20           |
| 12             | Human           | 114                       | FSWGAEGQPRPGFGYGGRASD | 20           |
| 13             | Human           | 124                       | GFGYGGRASDYKSAHKGFKG  | 20           |
| 14             | Human           | 134                       | YKSAHKGFKGVDAQGTLSKI  | 20           |
| 15             | Human           | 144                       | VDAQGTLSKIFKLGGRDSRS  | 20           |
| 16             | Human           | 153                       | IFKLGGRDSRSGSPMARR    | 18           |
